# Supplementary material for: Controlling the polymerization of coniferyl alcohol with cyclodextrins
Source: Royal Society of Chemistry journal article supplement (doi:10.1039/c8nj01039k), 2018-01-01
Supplement: c8nj01039k1.pdf [file c8nj01039k1.pdf]

## Controlling the polymerization of coniferyl alcohol with cyclodextrins.

Lionel Tarrago\*, Camille Modolo, Mehdi Yemloul, Viviane Robert, Pierre Rousselot-Pailley, Thierry Tron\*

Aix Marseille Université, CNRS, iSm2 UMR 7313, 13397, Marseille, France

\* Corresponding authors: Lionel Tarrago, Thierry Tron

E-mail address: [lioneltarrago@msn.com](mailto:lioneltarrago@msn.com); [thierry.tron@univ-amu.fr](mailto:thierry.tron@univ-amu.fr)

### Supplementary Information

#### 1. Enzymes and chemicals

The laccase LAC3 (from *Trametes* sp C30) was produced in *Aspergillus niger* and purified as described previously.<sup>1</sup> Protein concentration was estimated by UV-visible spectroscopy using an  $\epsilon_{600\text{ nm}} = 5 \times 10^3 \text{ M}^{-1}\cdot\text{cm}^{-1}$  for the T1 copper. Laccase activity of the purified protein solution was assayed using 2,2'-azino-bis(3-ethylbenzthiazoline-6-sulphonic acid) (ABTS). One unit (U) of laccase oxidizes one micromole of ABTS per minute.

Alpha-cyclodextrin ( $\alpha$ CD), beta-cyclodextrin ( $\beta$ CD) and gamma-cyclodextrin ( $\gamma$ CD) were obtained from Aldrich or TCI Europe. Beta-cyclodextrin ( $\beta$ CD) was recrystallized twice in 60 % ethanol. Dehydroconiferyl alcohols (**2**) and ( $\pm$ )-pinoresinols (**3**) were obtained from the bioconversion of coniferyl alcohol (**1**) (purchased from Sigma France) catalysed by the enzyme LAC3, purified by preparative chromatography (silica) and characterized by <sup>1</sup>H NMR and mass spectrometry. All other chemicals were purchased from Sigma France.

#### 2. Synthesis of ( $\pm$ )-guaiacylglycerol 8-O-4'-coniferyl alcohol ethers (**4**)

**4** was obtained by oxidation of **1** in the presence of silver oxide ( $\text{Ag}_2\text{O}$ ) following a protocol described Kishimoto et al., 2015.<sup>2</sup> The product of interest was purified by preparative chromatography (silica) and characterized by <sup>1</sup>H NMR and mass spectrometry.

#### 3. Coniferyl alcohol oxidation in the presence of CD

Oxidation of coniferyl alcohol was performed at 30°C in Britton-Robinson buffer adjusted at pH 5.0 and oxidation products were detected by reverse phase HPLC. A typical reaction mixture (1 mL) contained LAC3 (5 U/L) and coniferyl alcohol (2.5  $10^{-3}$  M) in the absence or presence of CD (up to 12  $10^{-3}$  M). The reaction proceeded for 8-hours and was initiated by the addition of the enzyme. For each time-point, the reaction was stopped by mixing 100- $\mu\text{L}$  aliquot to 100  $\mu\text{L}$  acetonitrile containing 2.85 mM benzophenone. 30  $\mu\text{L}$  was injected on C18 column (EC150/4 Nucleosil® 100-5-18 Macherey-Nagel™) and analyzed by HPLC (Waters™ Alliance® 2690/2690D Separations Module) with the following gradient: solvent A water containing 3% acetic acid, solvent B acetonitrile; t=0min 90%A 10%B, t=5min 90%A 10%B, t=25 min 50% A 50% B, t= 27 min 50% A 50% B, t=28 min 90%A 10% B, t=30 min 90%A 10%B. Coniferyl alcohol, dehydroconiferyl alcohol, pinoresinol and benzophenone were eluted at 4.0 min, 6.6 min, 8.2 min and 16.6 min, respectively. Quantity was normalized using benzophenone as internal reference.

Apparent  $K_M$  and  $k_{cat}$  values were obtained from the initial rate ( $v$ ), enzyme concentration ( $E$ ) and substrate concentration ( $S$ ) according to the equation  $v = k_{cat} E S / (K_M + S)$ . Inhibition kinetics data were obtained using appropriate equations. All data were determined using non-linear regression fitting using Prism software, Graphpad, San Diego, (CA). Because laccase catalysis involves two substrates

and the  $[O_2]$  was invariant and assumed to be saturating in this study, the measured  $K_M$  for the various substrates used should be considered apparent. Because of the assumption that 100% of the laccase participated in the catalysis as active enzyme, the measured  $k_{cat}$  should also be considered apparent.

#### 4. Fitting kinetics

The oxidation of coniferyl alcohol (**1**) by the enzyme laccase is a mono-electronic process leading to the transient formation of a radical species (**1 $\cdot$** ) (eq. 1). Radical molecules recombine to give dimers **2**, **3** and **4** according to eq. 2. Dimers are themselves subsequently oxidized by the enzyme (eq. 2, 4, 5) in a reaction similar to the oxidation of **1**.

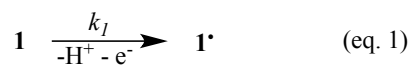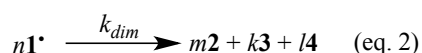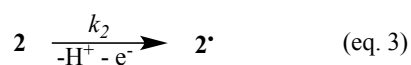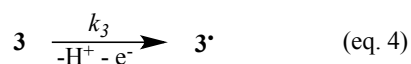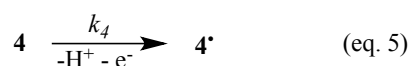

Kinetic data presented in Figure 1 from the main article were simulated using the stochastic kinetics simulator Kinetiscope (freeware)<sup>3</sup>. In the simulation, we introduced:

- the initial concentration of coniferyl alcohol [**1**] =  $2.5 \cdot 10^{-3} \text{M}$
- rate constants from (eq. 1, 3, 4, 5) initially derived from experimental data presented in Fig. 1 and Fig. 2 from the main article:  $k_1 = 3.3 \text{ h}^{-1}$ ;  $k_2 = 0.3 \text{ h}^{-1}$ ;  $k_3 = 0.5 \text{ h}^{-1}$ ;  $k_4 = 0.25 \text{ h}^{-1}$
- a bi-molecular constant  $k_{dim}$  from (eq. 2) arbitrary set to a value of  $\gg k_1, k_2, k_3, k_4$  (i.e.  $10^6 \text{ M}^{-1} \cdot \text{h}^{-1}$ ). With this *approximation* we recognize the recombination of radicals as a process considerably faster than oxidation steps and we do not distinguish the formation of each dimer **2**, **3** and **4** (eq. 2).

The model obtained (Fig. SI1) is compatible with experimental data (Fig. 1 main text).

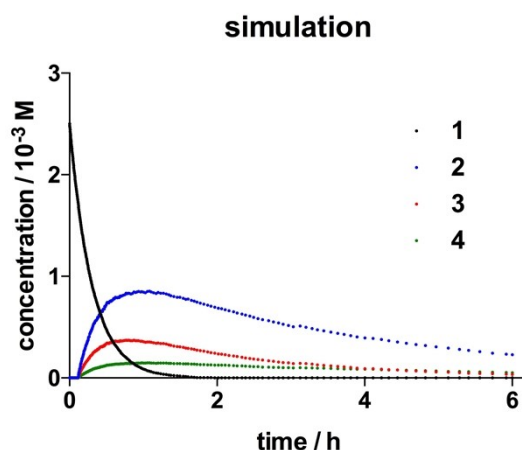

**Figure SI1. Simulation of the formation of lignans from the oxidation of coniferyl alcohol.** Stochastic calculations performed with the freeware Kinetiscope. Initial parameters: [**1**] =  $2.5 \cdot 10^{-3} \text{M}$ ,  $k_1 = 3.3 \text{ h}^{-1}$ ;  $k_2 = 0.3 \text{ h}^{-1}$ ;  $k_3 = 0.5 \text{ h}^{-1}$ ;  $k_4 = 0.25 \text{ h}^{-1}$ .

Eventually, kinetics of the two successive oxidations leading to the formation and to the disappearance of each dimer (see Fig. 1 panels 2 and 3 main text) can be fitted using the simple model:

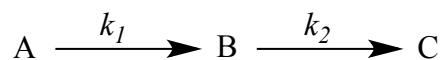

treated as a succession of order 1 kinetics in which the dimerization step is not influencing the rate (i.e.  $k_{dim} \gg k_1, k_2$ ).

$$Y = \left( \frac{a \cdot k_1}{k_2 - k_1} \right) \cdot (\exp(-k_1 \cdot X) - \exp(-k_2 \cdot X))$$

with  $k_1$  = rate constant for the oxidation of the alcohol and  $k_2$  = rate constant for the oxidation of the dimer.

### 5. Determination of the apparent association constant and complex structure by NMR

All experiments were performed at 298K in D<sub>2</sub>O on a Bruker Advance III 600MHz spectrometer, equipped with a 5mm triple resonance high resolution probe. All NMR datasets were processed in TOPSPIN 3.2 version (Bruker BioSpin, Germany). Proton NMR spectra were acquired with a spectral width of 6000 Hz and relaxation delay of 2s during which a water pre-saturation was applied.

$K_a$  values were extracted from Scott plots ( $[CD]_t / \Delta\delta_{obs} = ([CD]_t / \Delta\delta_c) + (1/K_a \Delta\delta_c)$ ).<sup>4</sup>

$\delta_l$  = chemical shift of a proton from the ligand or from the free CD.

$\delta_c$  = chemical shift of the same proton in the ligand:CD complex.

$$\Delta\delta_{obs} = \delta_l - \delta_c$$

Plots for  $\beta$ CD complexes are given in Figure SI2.

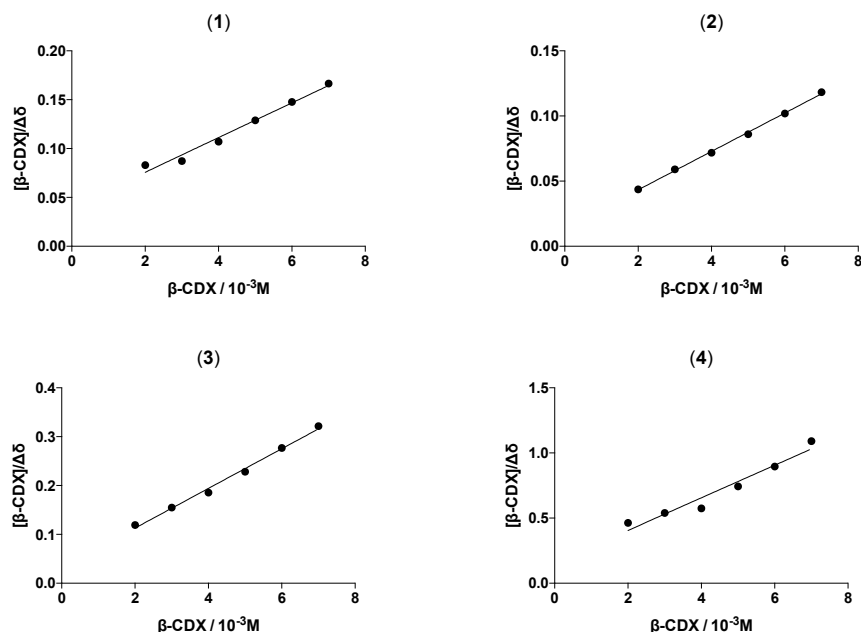

**Figure SI2. Representation of the ligand:  $\beta$ CD interaction (Scott plots).** [Ligand] =  $0.5 \cdot 10^{-3}M$ , [ $\beta$ CD] =  $2-7 \cdot 10^{-3}M$ .

The stoichiometry for all the CD:guest complexes was studied plotting the extend of the shifts as function of the evolution of the molar ratio between the CD ( $\beta$  or  $\gamma$ CD) and the ligand (Job Plots). Plots for  $\beta$ CD complexes are given in Figure SI3.

For complex structure analysis, 2D phase-sensitive ROESY were acquired by pulse field gradient-selected methods, with 32 scans and 2048-time domain in F2, and 384 experiments in F1 by using the TPPI method and a mixing time (spin-lock) of 200 ms at a field of 6 kHz.

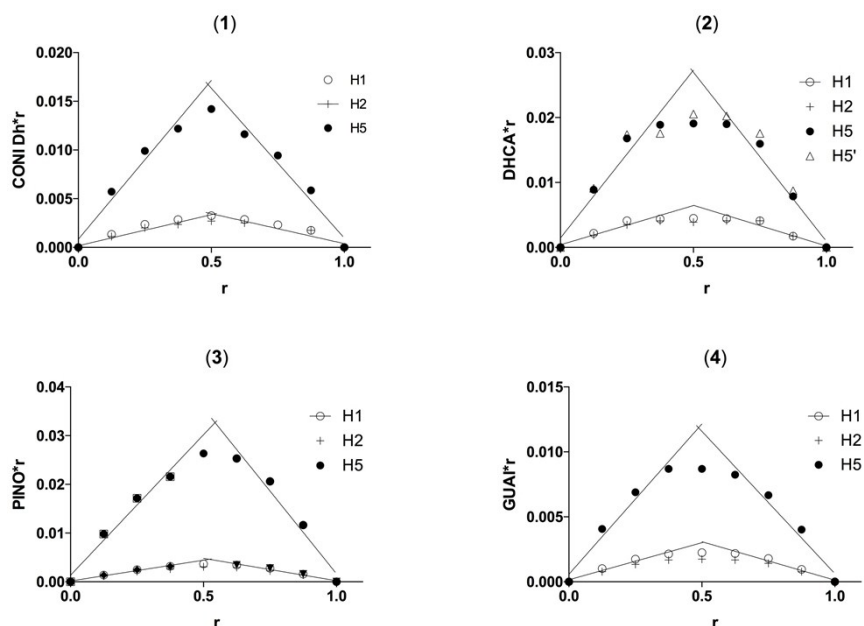

**Figure S13. Representation of the ligand:  $\beta$ CD interaction (Job plots).** [Ligand] = 0-8  $10^{-3}$ M, [ $\beta$ CD] = 8-0  $10^{-3}$ M. Chemical shifts from  $\beta$ CD protons H1, H2 and H5.

$\beta$ CD/pinoresinol complex deduced from the observed strong, medium, and low ROESY correlations effects between protons H<sub>2</sub>, H<sub>5</sub>, H<sub>6</sub> of ( $\pm$ )-pinoresinol and protons H'<sub>3</sub>, H'<sub>5</sub>, H'<sub>6</sub> of  $\beta$ CD is presented in the main text (Fig. 3). The proposed model is consolidated by strong interactions between protons H<sub>8</sub> and H<sub>9</sub> of ( $\pm$ )-pinoresinol with protons H'<sub>5</sub> of  $\beta$ CD (red double arrows).

It should be pointed out that only unambiguous correlations were considered. Those with overlapping patterns potentially involving intramolecular interactions were discarded as for example in the coniferyl alcohol 2D-ROESY map (see red rectangle in panel B of Fig. S1.4).

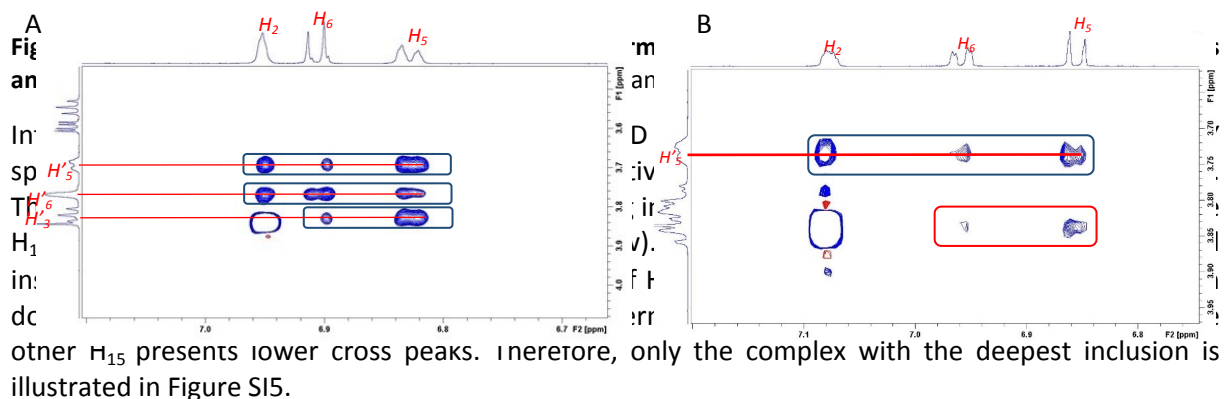

other H<sub>15</sub> presents lower cross peaks. Therefore, only the complex with the deepest inclusion is illustrated in Figure S15.

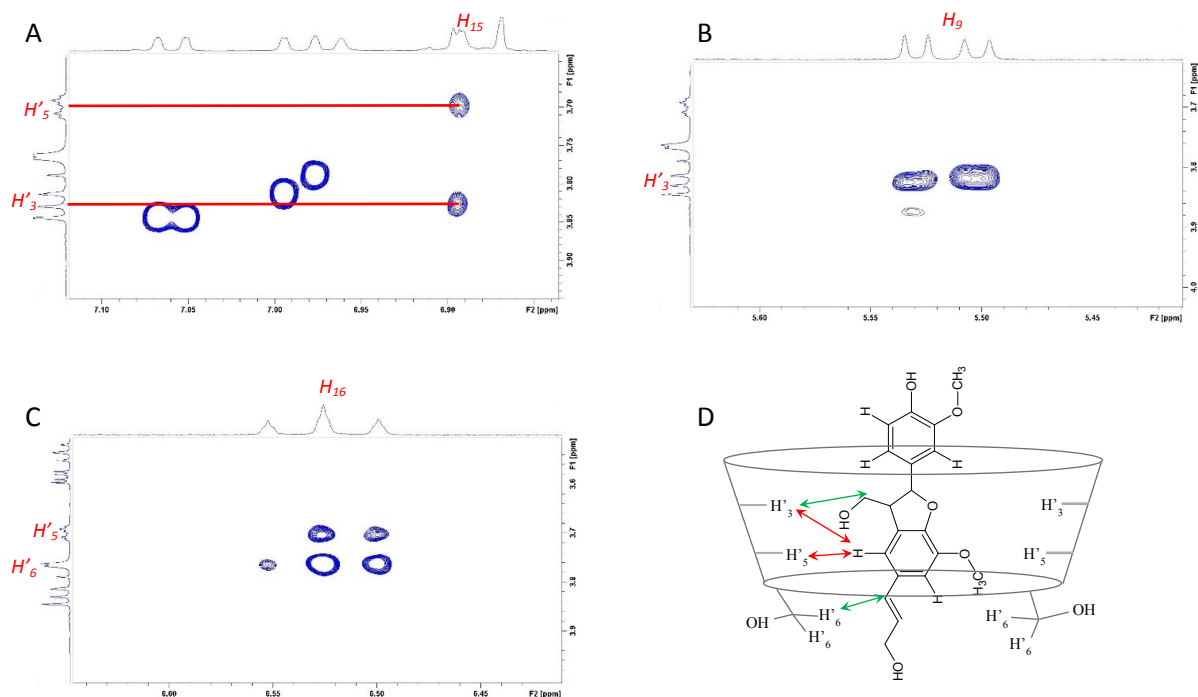

**Figure S15. Fragments of ROESY spectra showing the intermolecular interactions between protons from dehydro di-coniferyl alcohol and proton from  $\beta$ CD.** Panel A, zoom in the interactions between the proton H15 of dehydro di-coniferyl alcohol and protons H'3 and H'5 of  $\beta$ CD; panel B, zoom in the interactions between the proton H9 of dehydro di-coniferyl alcohol and protons H'3 of  $\beta$ CD (figure panel D); panel C, zoom in the interactions between the proton H16 of dehydro di-coniferyl alcohol and protons H'5 and H'6 of  $\beta$ CD (figure panel D); panel D, scheme of the potential interactions; double arrows indicate spatial dipolar interactions classified from each CD proton: close (red), intermediate (green).

#### 6. Evolution of dimers production as function of the initial coniferyl alcohol concentration

Oxidation of coniferyl alcohol was performed and analysed as described earlier in the text (see paragraph 2). A typical reaction mixture (1 mL) contained LAC3 (5 U/L) coniferyl alcohol (2.5, 5 or 10  $10^{-3}$  M) in the presence (or absence) of 12  $10^{-3}$  M of  $\beta$ CD.

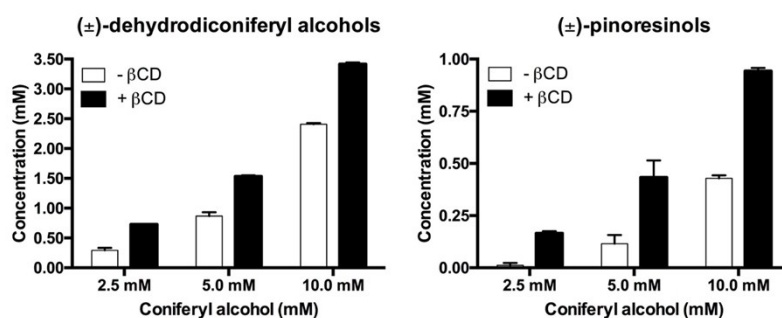

**Figure S16. Effects of a variable initial concentrations of coniferyl alcohol on the formation of dimers in the presence of  $\beta$ CD.**

- 1 Y. Mekmouche, S. M. Zhou, A. M. Cusano, E. Record, A. Lomascolo, V. Robert, A. J. Simaan, P. Rousselot-Pailley, S. Ullah, F. Chaspoul, T. Tron, *J. Biosc. and Bioeng.*, **2014**, *117*, 25-27.
- 2 Kishimoto T., Takahashi N., Hamada M., Nakajima N., *J. Agri. Food Chem.*, **2015**, *63*, 2277-2283.
- 3 W. Hinsberg, F. Houle. Kinetiscope™, a stochastic simulator v1.0.593.x64. © Columbia Hill Technical Consulting (2015)
- 4 Scott. R. L., *Rec. Trav. Chem. Pays – Bas*, **1956**, *75*, 787 – 789.
